# Supplementary material
Source: Springer Nature journal article supplement (https://www.springermedizin.de/resource/supplementary/13049_2010_158_MOESM1_ESM.pdf/9666004)

Difference between

directly calculated ISS and ICDPIC calculated ISS

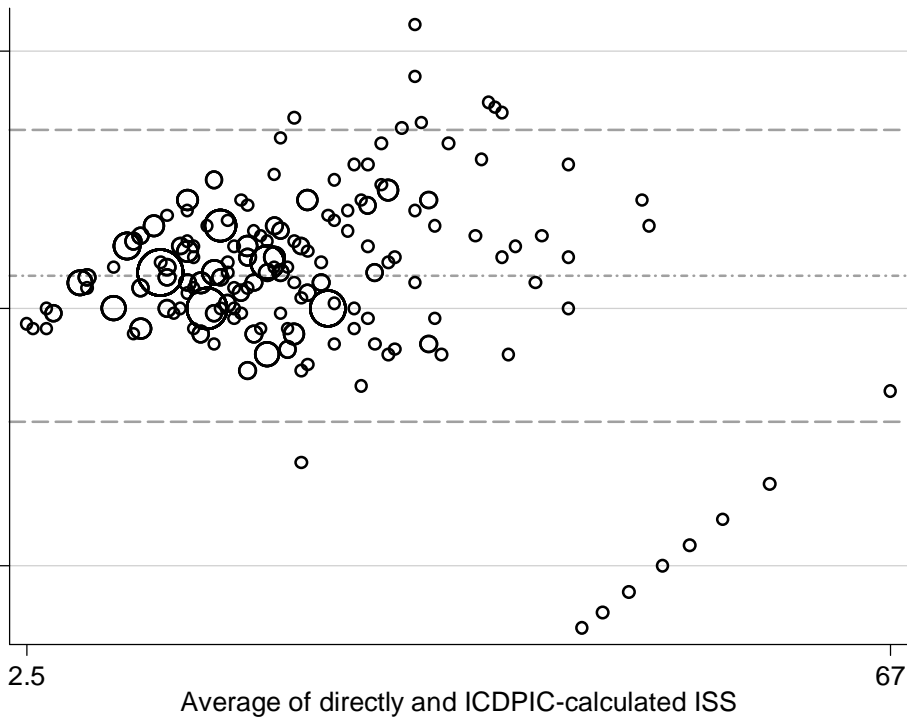

Supplement: MOESM1 [file 9666004]
